# Supplementary material for: Barriers and facilitators to participation in exercise prehabilitation before cancer surgery for older adults with frailty: a qualitative study
Source: PubMed Central journal article supplement (PMC10242997; doi:10.1186/s12877-023-03990-3), 2023-06-06
Supplement: 12877_2023_3990_MOESM1_ESM.pdf [file 12877_2023_3990_MOESM1_ESM.pdf]

## COREQ (Consolidated criteria for REporting Qualitative research) Checklist

| Topic                                          | Item No. | Guide Questions/Description                                                                                                                              | Reported on Page No. |
|------------------------------------------------|----------|----------------------------------------------------------------------------------------------------------------------------------------------------------|----------------------|
| <b>Domain 1: Research team and reflexivity</b> |          |                                                                                                                                                          |                      |
| <i>Personal characteristics</i>                |          |                                                                                                                                                          |                      |
| Interviewer/facilitator                        | 1        | Which author/s conducted the interview or focus group?                                                                                                   | p. 8                 |
| Credentials                                    | 2        | What were the researcher's credentials? E.g. PhD, MD                                                                                                     | p. 6                 |
| Occupation                                     | 3        | What was their occupation at the time of the study?                                                                                                      | p. 6                 |
| Gender                                         | 4        | Was the researcher male or female?                                                                                                                       | p. 6                 |
| Experience and training                        | 5        | What experience or training did the researcher have?                                                                                                     | p. 6                 |
| <i>Relationship with participants</i>          |          |                                                                                                                                                          |                      |
| Relationship established                       | 6        | Was a relationship established prior to study commencement?                                                                                              | p. 8                 |
| Participant knowledge of the interviewer       | 7        | What did the participants know about the researcher? e.g. personal goals, reasons for doing the research                                                 | N/A                  |
| Interviewer characteristics                    | 8        | What characteristics were reported about the interviewer/facilitator? e.g. Bias, assumptions, reasons and interests in the research topic                | p. 6-7               |
| <b>Domain 2: Study design</b>                  |          |                                                                                                                                                          |                      |
| <i>Theoretical framework</i>                   |          |                                                                                                                                                          |                      |
| Methodological orientation and Theory          | 9        | What methodological orientation was stated to underpin the study? e.g. grounded theory, discourse analysis, ethnography, phenomenology, content analysis | p. 6, 9              |
| <i>Participant selection</i>                   |          |                                                                                                                                                          |                      |
| Sampling                                       | 10       | How were participants selected? e.g. purposive, convenience, consecutive, snowball                                                                       | p. 7                 |
| Method of approach                             | 11       | How were participants approached? e.g. face-to-face, telephone, mail, email                                                                              | p. 8                 |
| Sample size                                    | 12       | How many participants were in the study?                                                                                                                 | p. 8, 9              |
| Non-participation                              | 13       | How many people refused to participate or dropped out? Reasons?                                                                                          | N/A                  |
| <i>Setting</i>                                 |          |                                                                                                                                                          |                      |
| Setting of data collection                     | 14       | Where was the data collected? e.g. home, clinic, workplace                                                                                               | p. 8                 |
| Presence of non-participants                   | 15       | Was anyone else present besides the participants and researchers?                                                                                        | N/A                  |
| Description of sample                          | 16       | What are the important characteristics of the sample? e.g. demographic data, date                                                                        | p. 7, 10             |
| <i>Data collection</i>                         |          |                                                                                                                                                          |                      |
| Interview guide                                | 17       | Were questions, prompts, guides provided by the authors? Was it pilot tested?                                                                            | p. 8                 |
| Repeat interviews                              | 18       | Were repeat interviews carried out? If yes, how many?                                                                                                    | N/A                  |
| Audio/visual recording                         | 19       | Did the research use audio or visual recording to collect the data?                                                                                      | p. 8                 |
| Field notes                                    | 20       | Were field notes made during and/or after the interview or focus group?                                                                                  | N/A                  |
| Duration                                       | 21       | What was the duration of the interviews or focus group?                                                                                                  | p. 10                |
| Data saturation                                | 22       | Was data saturation discussed?                                                                                                                           | p. 8, 9              |
| Transcripts returned                           | 23       | Were transcripts returned to participants for comment and/or                                                                                             | N/A                  |

| Topic                                  | Item No. | Guide Questions/Description                                                                                                        | Reported on Page No. |
|----------------------------------------|----------|------------------------------------------------------------------------------------------------------------------------------------|----------------------|
|                                        |          | correction?                                                                                                                        |                      |
| <b>Domain 3: analysis and findings</b> |          |                                                                                                                                    |                      |
| <i>Data analysis</i>                   |          |                                                                                                                                    |                      |
| Number of data coders                  | 24       | How many data coders coded the data?                                                                                               | p. 9                 |
| Description of the coding tree         | 25       | Did authors provide a description of the coding tree?                                                                              | p. 9                 |
| Derivation of themes                   | 26       | Were themes identified in advance or derived from the data?                                                                        | p. 9                 |
| Software                               | 27       | What software, if applicable, was used to manage the data?                                                                         | p. 9                 |
| Participant checking                   | 28       | Did participants provide feedback on the findings?                                                                                 | N/A                  |
| <i>Reporting</i>                       |          |                                                                                                                                    |                      |
| Quotations presented                   | 29       | Were participant quotations presented to illustrate the themes/findings?<br>Was each quotation identified? e.g. participant number | p. 11-17             |
| Data and findings consistent           | 30       | Was there consistency between the data presented and the findings?                                                                 | p. 10-17             |
| Clarity of major themes                | 31       | Were major themes clearly presented in the findings?                                                                               | p. 11-17             |
| Clarity of minor themes                | 32       | Is there a description of diverse cases or discussion of minor themes?                                                             | N/A                  |
